# Supplementary material
Source: PubMed Central journal article supplement (PMC7001601)
Supplement: hmg-2019-tf-00253_supplemental_ddz228.pdf [file hmg-2019-tf-00253_supplemental_ddz228.pdf]

## Supplementary Materials

**Supplementary Table 1. eQTL analysis for rs9831894 and rs6773363**

| GWAS SNP  | SNPs in LD  | #Chr | Position  | eQTL Cluster (GTEx)                      |
|-----------|-------------|------|-----------|------------------------------------------|
| rs9831894 | rs9831894   | 3    | 121800487 | CD86;testis,                             |
| rs9831894 | rs9828869   | 3    | 121748360 | CD86;testis,                             |
| rs9831894 | rs1962532   | 3    | 121751531 | 0                                        |
| rs9831894 | rs527769191 | 3    | 121759584 | 0                                        |
| rs9831894 | rs62269210  | 3    | 121760603 | 0                                        |
| rs9831894 | rs62269211  | 3    | 121760639 | 0                                        |
| rs9831894 | rs28876421  | 3    | 121764257 | 0                                        |
| rs9831894 | rs2255214   | 3    | 121770539 | 0                                        |
| rs9831894 | rs17203397  | 3    | 121781426 | 0                                        |
| rs9831894 | rs6786977   | 3    | 121782806 | 0                                        |
| rs9831894 | rs2681411   | 3    | 121785631 | 0                                        |
| rs9831894 | rs4308217   | 3    | 121793187 | 0                                        |
| rs9831894 | rs35187120  | 3    | 121796389 | 0                                        |
| rs9831894 | rs11717893  | 3    | 121806825 | 0                                        |
| rs9831894 | rs9836399   | 3    | 121811811 | CD86;testis,                             |
| rs9831894 | rs9289187   | 3    | 121815461 | CD86;testis,                             |
| rs9831894 | rs2681416   | 3    | 121817613 | CD86;testis,                             |
| rs9831894 | rs2332096   | 3    | 121821143 | CD86;testis,                             |
| rs9831894 | rs1915092   | 3    | 121823375 | 0                                        |
| rs9831894 | rs2262495   | 3    | 121841801 | 0                                        |
| rs9831894 | rs2681401   | 3    | 121843127 | 0                                        |
| rs9831894 | rs2715272   | 3    | 121843241 | 0                                        |
| rs6773363 | rs6773363   | 3    | 27793632  | 0                                        |
| rs6773363 | rs2371108   | 3    | 27757018  | RP11-222K16.2;Esophagus -<br>Muscularis, |
| rs6773363 | rs530939637 | 3    | 27757867  | 0                                        |
| rs6773363 | rs2371109   | 3    | 27758274  | 0                                        |
| rs6773363 | rs2887944   | 3    | 27758275  | 0                                        |
| rs6773363 | rs9866625   | 3    | 27759338  | 0                                        |
| rs6773363 | rs56306375  | 3    | 27760524  | 0                                        |
| rs6773363 | rs368178421 | 3    | 27763427  | 0                                        |
| rs6773363 | rs3806624   | 3    | 27764623  | 0                                        |
| rs6773363 | rs3840481   | 3    | 27765595  | 0                                        |
| rs6773363 | rs34269949  | 3    | 27769551  | 0                                        |
| rs6773363 | rs1353286   | 3    | 27772014  | 0                                        |
| rs6773363 | rs5847475   | 3    | 27772346  | 0                                        |
| rs6773363 | rs549698945 | 3    | 27774208  | 0                                        |
| rs6773363 | rs6801231   | 3    | 27774245  | 0                                        |
| rs6773363 | rs34860778  | 3    | 27776242  | 0                                        |
| rs6773363 | rs9880772   | 3    | 27777779  | 0                                        |
| rs6773363 | rs12635205  | 3    | 27779362  | 0                                        |
| rs6773363 | rs34024889  | 3    | 27780638  | 0                                        |
| rs6773363 | rs13327021  | 3    | 27783015  | 0                                        |
| rs6773363 | rs4680838   | 3    | 27783476  | 0                                        |
| rs6773363 | rs9310852   | 3    | 27784997  | 0                                        |
| rs6773363 | rs145548114 | 3    | 27786022  | 0                                        |
| rs6773363 | rs11129295  | 3    | 27788780  | 0                                        |
| rs6773363 | rs12330493  | 3    | 27791614  | 0                                        |

|           |             |   |          |   |
|-----------|-------------|---|----------|---|
| rs6773363 | rs6806966   | 3 | 27793862 | 0 |
| rs6773363 | rs13093489  | 3 | 27794907 | 0 |
| rs6773363 | rs7371953   | 3 | 27795157 | 0 |
| rs6773363 | rs12497690  | 3 | 27795397 | 0 |
| rs6773363 | rs113106250 | 3 | 27797023 | 0 |
| rs6773363 | rs199900263 | 3 | 27797030 | 0 |
| rs6773363 | rs12493245  | 3 | 27797810 | 0 |
| rs6773363 | rs4680843   | 3 | 27798071 | 0 |
| rs6773363 | rs4680844   | 3 | 27798172 | 0 |
| rs6773363 | rs9860067   | 3 | 27798275 | 0 |
| rs6773363 | rs4680845   | 3 | 27799034 | 0 |
| rs6773363 | rs17020283  | 3 | 27799105 | 0 |
| rs6773363 | rs572217447 | 3 | 27799483 | 0 |
| rs6773363 | rs572217447 | 3 | 27799483 | 0 |
| rs6773363 | rs9862284   | 3 | 27800325 | 0 |
| rs6773363 | rs6795177   | 3 | 27800734 | 0 |
| rs6773363 | rs17020287  | 3 | 27801879 | 0 |
| rs6773363 | rs60047326  | 3 | 27801932 | 0 |
| rs6773363 | rs17020288  | 3 | 27801959 | 0 |
| rs6773363 | rs9814971   | 3 | 27802163 | 0 |
| rs6773363 | rs9872851   | 3 | 27802302 | 0 |
| rs6773363 | rs9815263   | 3 | 27802364 | 0 |
| rs6773363 | rs9815419   | 3 | 27802488 | 0 |
| rs6773363 | rs56143766  | 3 | 27802504 | 0 |
| rs6773363 | rs9816235   | 3 | 27803017 | 0 |
| rs6773363 | rs4680730   | 3 | 27804731 | 0 |
| rs6773363 | rs4680851   | 3 | 27805177 | 0 |
| rs6773363 | rs4680852   | 3 | 27805204 | 0 |
| rs6773363 | rs5847478   | 3 | 27805726 | 0 |
| rs6773363 | rs2371150   | 3 | 27806147 | 0 |
| rs6773363 | rs4450763   | 3 | 27806852 | 0 |
| rs6773363 | rs4522733   | 3 | 27807006 | 0 |
| rs6773363 | rs4371473   | 3 | 27807063 | 0 |
| rs6773363 | rs12497514  | 3 | 27807665 | 0 |
| rs6773363 | rs55998928  | 3 | 27807730 | 0 |
| rs6773363 | rs11711117  | 3 | 27809342 | 0 |
| rs6773363 | rs200433332 | 3 | 27809401 | 0 |
| rs6773363 | rs1000361   | 3 | 27810319 | 0 |
| rs6773363 | rs9868208   | 3 | 27810888 | 0 |
| rs6773363 | rs5012869   | 3 | 27811220 | 0 |
| rs6773363 | rs62253101  | 3 | 27811637 | 0 |
| rs6773363 | rs9878524   | 3 | 27812457 | 0 |
| rs6773363 | rs9878720   | 3 | 27812594 | 0 |
| rs6773363 | rs9823274   | 3 | 27812666 | 0 |
| rs6773363 | rs4680861   | 3 | 27812802 | 0 |
| rs6773363 | rs4279053   | 3 | 27813319 | 0 |
| rs6773363 | rs11915329  | 3 | 27814628 | 0 |
| rs6773363 | rs62253104  | 3 | 27815285 | 0 |
| rs6773363 | rs201123277 | 3 | 27815370 | 0 |
| rs6773363 | rs6551228   | 3 | 27815535 | 0 |
| rs6773363 | rs10049011  | 3 | 27815942 | 0 |
| rs6773363 | rs13083047  | 3 | 27817959 | 0 |
| rs6773363 | rs9872426   | 3 | 27818453 | 0 |
| rs6773363 | rs7628641   | 3 | 27818887 | 0 |

|           |             |   |          |                               |
|-----------|-------------|---|----------|-------------------------------|
| rs6773363 | rs7628648   | 3 | 27818893 | 0                             |
| rs6773363 | rs7621606   | 3 | 27819783 | 0                             |
| rs6773363 | rs12633504  | 3 | 27819955 | 0                             |
| rs6773363 | rs9838021   | 3 | 27820995 | 0                             |
| rs6773363 | rs60294567  | 3 | 27821359 | 0                             |
| rs6773363 | rs7646728   | 3 | 27822171 | 0                             |
| rs6773363 | rs7647094   | 3 | 27822530 | 0                             |
| rs6773363 | rs545045422 | 3 | 27823712 | 0                             |
| rs6773363 | rs545045422 | 3 | 27823712 | 0                             |
| rs6773363 | rs7627710   | 3 | 27823887 | 0                             |
| rs6773363 | rs11710954  | 3 | 27824022 | 0                             |
| rs6773363 | rs7653004   | 3 | 27824089 | 0                             |
| rs6773363 | rs11711718  | 3 | 27824134 | 0                             |
| rs6773363 | rs57583032  | 3 | 27824709 | 0                             |
| rs6773363 | rs11129297  | 3 | 27825386 | 0                             |
| rs6773363 | rs7633952   | 3 | 27825912 | 0                             |
| rs6773363 | rs7626965   | 3 | 27826752 | 0                             |
| rs6773363 | rs4491854   | 3 | 27826932 | 0                             |
| rs6773363 | rs34089683  | 3 | 27827398 | 0                             |
| rs6773363 | rs9817112   | 3 | 27827733 | 0                             |
| rs6773363 | rs4680868   | 3 | 27829161 | RP11-222K16.1;nerve - Tibial, |
| rs6773363 | rs11925920  | 3 | 27829393 | 0                             |
| rs6773363 | rs561194513 | 3 | 27829950 | 0                             |
| rs6773363 | rs11712606  | 3 | 27830379 | 0                             |
| rs6773363 | rs543125886 | 3 | 27830535 | 0                             |
| rs6773363 | rs556526857 | 3 | 27830865 | 0                             |
| rs6773363 | rs60579266  | 3 | 27831914 | 0                             |
| rs6773363 | rs6551229   | 3 | 27831978 | 0                             |

eQTL, expression quantitative trait loci; GTEX, Genotype-Tissue Expression

**Supplementary Table 2.** Summary of the participating studies and genotyping methods in discovery.

| Study    | Study name                                                                                                                                   | No. cases | No. controls | Design                                                                        | Description of the study                                                                                                                                                                                                                                                                                                                                     | Genotyping platform                                                                        | Genotype calling algorithm | Imputation Software |
|----------|----------------------------------------------------------------------------------------------------------------------------------------------|-----------|--------------|-------------------------------------------------------------------------------|--------------------------------------------------------------------------------------------------------------------------------------------------------------------------------------------------------------------------------------------------------------------------------------------------------------------------------------------------------------|--------------------------------------------------------------------------------------------|----------------------------|---------------------|
| NCI-SEER | National Cancer Institute-Surveillance, Epidemiology, and End Results Interdisciplinary Case-Control Study of Non-Hodgkin Lymphoma           | 2661      | 6221         | Pooling of case-control studies, nested case-control studies from cohorts     | 8 Population-based case-control studies. 5 clinic or hospital-based or mixed case-control studies. 9 cohort studies.                                                                                                                                                                                                                                         | Illumina OmniExpress                                                                       | BeadStudio (GenCall)       | IMPUTE2             |
| GELA     | Treatment program of DLBCL patients from the Groupe d'Etude des Lymphomes de l'Adulte (GELA) consisting in LNH03-1B, 2B, 3B, 39B, 6B and 7B. | 549       | 525          | Cases from randomized clinical trial with population-based controls from EPIC | Patients recruited in the study that consented to DNA analysis. Controls were from the EPIC cohort                                                                                                                                                                                                                                                           | Illumina HumanHap 610K (cases)<br>Illumina HumanHap 610K and 660W<br>BeadStudio (controls) | BeadStudio (GenCall)       | IMPUTE2             |
| MAYO     | Mayo Clinic Case-Control Study of NHL and CLL and Iowa-Mayo SPORE Molecular Epidemiology Resource                                            | 393       | 172          | Clinic-based case-control study and clinic-based registry                     | Consecutive patients with newly diagnosed, histologically-confirmed non-Hodgkin lymphoma (excluding HIV-infected cases) who were residents of Minnesota, Iowa or Wisconsin. Controls were selected from patients seen in the general medicine clinics at Mayo with a pre-scheduled general medical examination, frequency on age, sex, and geographic region | Illumina HumanHap 660W                                                                     | BeadStudio (GenCall)       | IMPUTE2             |

|           |                                                   |     |     |                                        |                                                                                                                                                                                                                                                                                                                                                                                                                                                                                    |                                 |                         |         |
|-----------|---------------------------------------------------|-----|-----|----------------------------------------|------------------------------------------------------------------------------------------------------------------------------------------------------------------------------------------------------------------------------------------------------------------------------------------------------------------------------------------------------------------------------------------------------------------------------------------------------------------------------------|---------------------------------|-------------------------|---------|
| UCSF<br>2 | Molecular Epidemiology of<br>non-Hodgkin lymphoma | 254 | 748 | Population-based<br>case-control study | RCA/SEER Incident NHL<br>diagnosis for patients diagnosed in<br>hospitals in 6 San Francisco Bay<br>Area Counties and who were<br>residents of the Bay Area at the<br>time of diagnosis.<br>Controls ascertained through RDD<br>were frequency matched to cases<br>on age in 5-year groups, sex and<br>county of residence; Random<br>sampling of CMS lists for person<br>residing in the same 6 Bay Area<br>counties were used to supplement<br>recruitment of controls aged 65+. | Illumina<br>HumanCNV3<br>70-Duo | BeadStudio<br>(GenCall) | IMPUTE2 |
|-----------|---------------------------------------------------|-----|-----|----------------------------------------|------------------------------------------------------------------------------------------------------------------------------------------------------------------------------------------------------------------------------------------------------------------------------------------------------------------------------------------------------------------------------------------------------------------------------------------------------------------------------------|---------------------------------|-------------------------|---------|

**Supplementary Table 3.** Summary of the replication studies conducting de novo genotyping for this study.

| Study | Study name                                                                            | Design                                                         | Description of the study                                                                                               | SNP       | Genotyping platform | Quality Control                                    | Final No. Cases | Final No. Controls |
|-------|---------------------------------------------------------------------------------------|----------------------------------------------------------------|------------------------------------------------------------------------------------------------------------------------|-----------|---------------------|----------------------------------------------------|-----------------|--------------------|
| MAYO  | Iowa-Mayo SPORE Molecular Epidemiology Resource Mayo Clinic Case-Control Study of NHL | Clinic-based case registry and Clinic-based case-control study | See supplementary Table 1.                                                                                             | rs9831894 | Sequenom            | 99% concordance on 48 duplicates                   | 782             | 1053               |
|       |                                                                                       |                                                                |                                                                                                                        | rs6773363 | Taqman              | 100% concordance on 11 duplicates                  | 659             | 1059               |
| MDA   | MD Anderson lymphoma case-control study                                               | Case-control                                                   | Cases from MD Anderson Cancer Center. Controls from Kelsey Seybold Clinics.                                            | rs9831894 | Taqman              | 100% concordance on 6% replicates + 2 CEPH samples | 371             | 370                |
| MSKCC | Memorial-Sloan Kettering Lymphoproliferative disorders Study                          | Hospital-based case-study and NYCP controls                    | Cases were hospital clinic based ascertainment in a tertiary referral center. NYCP controls from same geographic area. | rs9831894 | Sequenom            | 100% concordance on 24 duplicates                  | 653             | 148                |

**Supplementary Table 4.** Public epigenetic data from B cells, lymphoma cell lines and patients

| Sample                     | Mark     | No. sample | ID         | Format   | Ref. |
|----------------------------|----------|------------|------------|----------|------|
| B cells                    | CREBBP   | 1          | GSM2386721 | sra      | (1)  |
| B cells                    | DNaseI   | 1          | GSM701492  | sra      | (2)  |
| B cells                    | H3K27ac  | 1          | GSM1027287 | sra      | (2)  |
| B cells                    | H3K27ac  | 1          | GSM1519135 | sra      | (3)  |
| B cells                    | H3K27ac  | 1          | GSM1519136 | sra      | (3)  |
| B cells                    | H3K27ac  | 1          | GSM1519134 | sra      | (3)  |
| B cells                    | H3K27ac  | 1          | GSM1519137 | sra      | (3)  |
| B cells                    | H3K27ac  | 1          | GSM2386722 | sra      | (1)  |
| B cells                    | H3K27ac  | 1          | GSM2386720 | sra      | (1)  |
| B cells                    | H3K27me3 | 1          | GSM971339  | sra      | (4)  |
| B cells                    | H3K27me3 | 1          | GSM537634  | tagalign | (2)  |
| B cells                    | H3K27me3 | 1          | GSM537638  | tagalign | (2)  |
| B cells                    | H3K4me1  | 1          | GSM916053  | sra      | (2)  |
| B cells                    | H3K4me1  | 1          | GSM1648036 | sra      | (5)  |
| B cells                    | H3K4me3  | 1          | GSM537622  | tagalign | (2)  |
| B cells                    | H3K4me3  | 1          | GSM1648037 | sra      | (5)  |
| DLBCL cell line OCI-LY1    | BRD4     | 1          | GSM1296634 | sra      |      |
| DLBCL cell line OCI-Ly1    | BRD4     | 1          | GSM1133650 | sra      | (6)  |
| DLBCL cell line OCI-LY7    | DHS      | 1          | GSM2308524 | sra      | (2)  |
| DLBCL cell line OCI-LY7    | DHS      | 1          | GSM2308525 | sra      | (2)  |
| DLBCL cell line OCI-Ly1    | H3K27ac  | 1          | GSM1133646 | sra      | (6)  |
| DLBCL cell line DHL6       | H3K27ac  | 1          | GSM1254194 | sra      | (6)  |
| DLBCL cell line HBL1       | H3K27ac  | 1          | GSM1254196 | sra      | (6)  |
| DLBCL cell line OCI-LY3    | H3K27ac  | 1          | GSM1254198 | sra      | (6)  |
| DLBCL cell line OCI-LY4    | H3K27ac  | 1          | GSM1254200 | sra      | (6)  |
| DLBCL cell line TOLEDO     | H3K27ac  | 1          | GSM1254202 | sra      | (6)  |
| DLBCL cell line DOHH2      | H3K27ac  | 1          | GSM1703895 | sra      | (7)  |
| DLBCL cell line KARPAS-422 | H3K27ac  | 1          | GSM1703909 | sra      | (7)  |
| DLBCL cell line OCI-LY1    | H3K27ac  | 1          | GSM1703914 | sra      | (7)  |
| DLBCL cell line OCI-LY7    | H3K27ac  | 1          | GSM1703918 | sra      | (7)  |
| DLBCL cell line PFEIFFER   | H3K27ac  | 1          | GSM1703923 | sra      | (7)  |
| DLBCL cell line SU-DHL4    | H3K27ac  | 1          | GSM1703927 | sra      | (7)  |
| DLBCL cell line TOLEDO     | H3K27ac  | 1          | GSM1703931 | sra      | (7)  |
| DLBCL cell line OCI-LY1    | H3K27ac  | 1          | GSM2037789 | sra      | (8)  |
| DLBCL cell line Pfeiffer   | H3K27me3 | 1          | GSM1006149 | sra      | (9)  |
| DLBCL cell line KARPAS-422 | H3K27me3 | 1          | GSM1006151 | sra      | (9)  |
| DLBCL cell line WSU-DLCL2  | H3K27me3 | 1          | GSM1006153 | sra      | (9)  |
| DLBCL cell line OCI-Ly1    | H3K4me3  | 1          | GSM1572767 | sra      | (10) |
| DLBCL cell line OCI-Ly1    | H3K4me3  | 1          | GSM1133648 | sra      | (6)  |
| DLBCL cell line OCI-LY1    | MED1     | 1          | GSM1296637 | sra      |      |
| DLBCL cell line DB         | MEF2B    | 1          | GSM1703891 | sra      | (7)  |
| DLBCL cell line DB         | MEF2B    | 1          | GSM1703892 | sra      | (7)  |
| DLBCL cell line DOHH2      | MEF2B    | 1          | GSM1703898 | sra      | (7)  |
| DLBCL cell line KARPAS-422 | MEF2B    | 1          | GSM1703911 | sra      | (7)  |
| DLBCL cell line SU-DHL4    | MEF2B    | 1          | GSM1703929 | sra      | (7)  |
| DLBCL cell line SU-DHL4    | MEF2B    | 1          | GSM1703930 | sra      | (7)  |
| DLBCL cell line OCI-LY1    | RNAPII   | 1          | GSM1296635 | sra      |      |
| DLBCL cell line OCI-Ly1    | RNAPII   | 1          | GSM1133652 | sra      | (6)  |

|                           |         |   |                                                                                                    |        |      |
|---------------------------|---------|---|----------------------------------------------------------------------------------------------------|--------|------|
| DLBCL cell line DOHH2     | BACH2   | 1 | GSM1703893                                                                                         | sra    | (7)  |
| DLBCL cell line OCI-LY7   | BACH2   | 1 | GSM1703916                                                                                         | sra    | (7)  |
| DLBCL cell line OCI-LY3   | BATF    | 1 | GSM1370272                                                                                         | sra    | (11) |
| DLBCL cell line OCI-LY10  | BATF    | 1 | GSM1370277                                                                                         | sra    | (11) |
| DLBCL cell line OCI-LY1   | BCL6    | 1 | GSM2754202                                                                                         | sra    | (12) |
| DLBCL cell line OCI-LY1   | BCL6    | 1 | GSM2754203                                                                                         | sra    | (12) |
| DLBCL cell line OCI-Ly1   | BCL6    | 1 | GSM1133657                                                                                         | sra    | (6)  |
| DLBCL cell line OCI-Ly1   | E2F1    | 1 | GSM1133656                                                                                         | sra    | (6)  |
| DLBCL cell line OCI-LY3   | IRF4    | 1 | GSM1370274                                                                                         | sra    | (11) |
| DLBCL cell line OCI-LY10  | IRF4    | 1 | GSM1370279                                                                                         | sra    | (11) |
| DLBCL cell line DOHH2     | PAX5    | 1 | GSM1703899                                                                                         | sra    | (7)  |
| DLBCL cell line OCI-LY7   | PAX5    | 1 | GSM1703921                                                                                         | sra    | (7)  |
| DLBCL cell line DOHH2     | PU.1    | 1 | GSM1703900                                                                                         | sra    | (7)  |
| DLBCL cell line OCI-LY7   | PU.1    | 1 | GSM1703922                                                                                         | sra    | (7)  |
| DLBCL cell line OCI-LY3   | SPIB    | 1 | GSM1370276                                                                                         | sra    | (11) |
| DLBCL cell line OCI-LY10  | SPIB    | 1 | GSM1370281                                                                                         | sra    | (11) |
| DLBCL cell line OCI-Ly19  | STAT3   | 1 | GSM1227205                                                                                         | sra    | (13) |
| DLBCL cell line OCI-Ly3   | STAT3   | 1 | GSM1227206                                                                                         | sra    | (13) |
| DLBCL cell line OCI-Ly7   | STAT3   | 1 | GSM1227207                                                                                         | sra    | (13) |
| DLBCL cell line SU-DHL10  | STAT3   | 1 | GSM1227208                                                                                         | sra    | (13) |
| DLBCL cell line SU-DHL2   | STAT3   | 1 | GSM1227209                                                                                         | sra    | (13) |
| DLBCL cell line SU-DHL4   | STAT3   | 1 | GSM1227210                                                                                         | sra    | (13) |
| DLBCL patients            | H3K27ac | 6 | GSM1254206,GSM1254208,GSM1254210,GSM1254212,GSM1254214,GSM1254216                                  | sra    | (6)  |
| HGB patients              | H3K27ac | 7 | GSM1703933,GSM1703935,GSM1703937,GSM1703939,GSM1703941,GSM1703943,GSM1703945                       | tdf    | (7)  |
| MCL cell lines GRANTA-519 | H3K27ac | 1 | GSM1703901                                                                                         | tdf    | (7)  |
| MCL cell lines JEKO-1     | H3K27ac | 1 | GSM1703903                                                                                         | tdf    | (7)  |
| MCL cell lines MINO       | H3K27ac | 1 | GSM1703912                                                                                         | tdf    | (7)  |
| MCL cell lines REC-1      | H3K27ac | 1 | GSM1703925                                                                                         | tdf    | (7)  |
| MCL cell lines HBL2       | H3K27ac | 1 | GSM2571789                                                                                         | tdf    | (14) |
| MCL cell lines JVM2       | H3K27ac | 1 | GSM2571791                                                                                         | tdf    | (14) |
| MCL cell lines MAVER-1    | H3K27ac | 1 | GSM2571793                                                                                         | tdf    | (14) |
| MCL cell lines SP-49      | H3K27ac | 1 | GSM2571828                                                                                         | tdf    | (14) |
| MCL cell lines Z138       | H3K27ac | 1 | GSM2571832                                                                                         | tdf    | (14) |
| MCL patients              | H3K27ac | 4 | GSM1703947,GSM1703949,GSM1703951,GSM1703953                                                        | tdf    | (7)  |
| MCL patients              | H3K27ac | 3 | GSM2760324,GSM2760326,GSM2760328                                                                   | tdf    | (14) |
| SLL patients              | H3K27ac | 3 | GSM1703955,GSM1703957,GSM1703959                                                                   | tdf    | (7)  |
| FL patients               | H3K27ac | 9 | GSM1523532,GSM1523535,GSM1523544,GSM1523550,GSM1523556,GSM1523559,GSM1523565,GSM1523571,GSM1523573 | bigwig | (15) |

Except DNase I hypersensitive site (DHS), other marks were assayed by ChIP-seq. FL, follicular lymphoma; HGB, high-grade B-cell lymphoma; MCL, mantle cell lymphoma; SLL, small lymphocytic lymphoma.



**Supplementary Figure 1. Epigenetic features of rs9831894 at independent loci associated with the risk of DLBCL.** Epigenetic features at the 3q13.33 risk locus. Tag SNP rs9831894 has a single linked variant ( $r^2 \geq 0.5$ ). Only rs9831894 was shown for its overlap with epigenetic marks, while the other one was in a region without the enrichment of the assayed epigenetic marks. In particular, The GWAS SNP rs9831894 is in a super-enhancer. The region spanning rs9831894 showed looping interactions with the promoters of *CD86* and *ILDR1*. E029, primary monocytes from peripheral blood (CD14+); E124, monocytes CD14+ RO01746 primary cells.

Chromatin state

- |                                                                                   |                                   |                                                                                   |                              |
|-----------------------------------------------------------------------------------|-----------------------------------|-----------------------------------------------------------------------------------|------------------------------|
|  | 1 Active TSS                      |  | 9 Heterochromatin            |
|  | 2 Flanking active TSS             |  | 10 Bivalent/poised TSS       |
|  | 3 Transcription at gene 5' and 3' |  | 11 Flanking bivalent TSS/Enh |
|  | 4 Strong transcription            |  | 12 Bivalent enhancer         |
|  | 5 Weak transcription              |  | 13 Repressed Polycomb        |
|  | 6 Genic enhancers                 |  | 14 Weak repressed Polycomb   |
|  | 7 Enhancers                       |                                                                                   | 15 Quiescent/low             |
|  | 8 ZNF genes + repeats             |                                                                                   |                              |

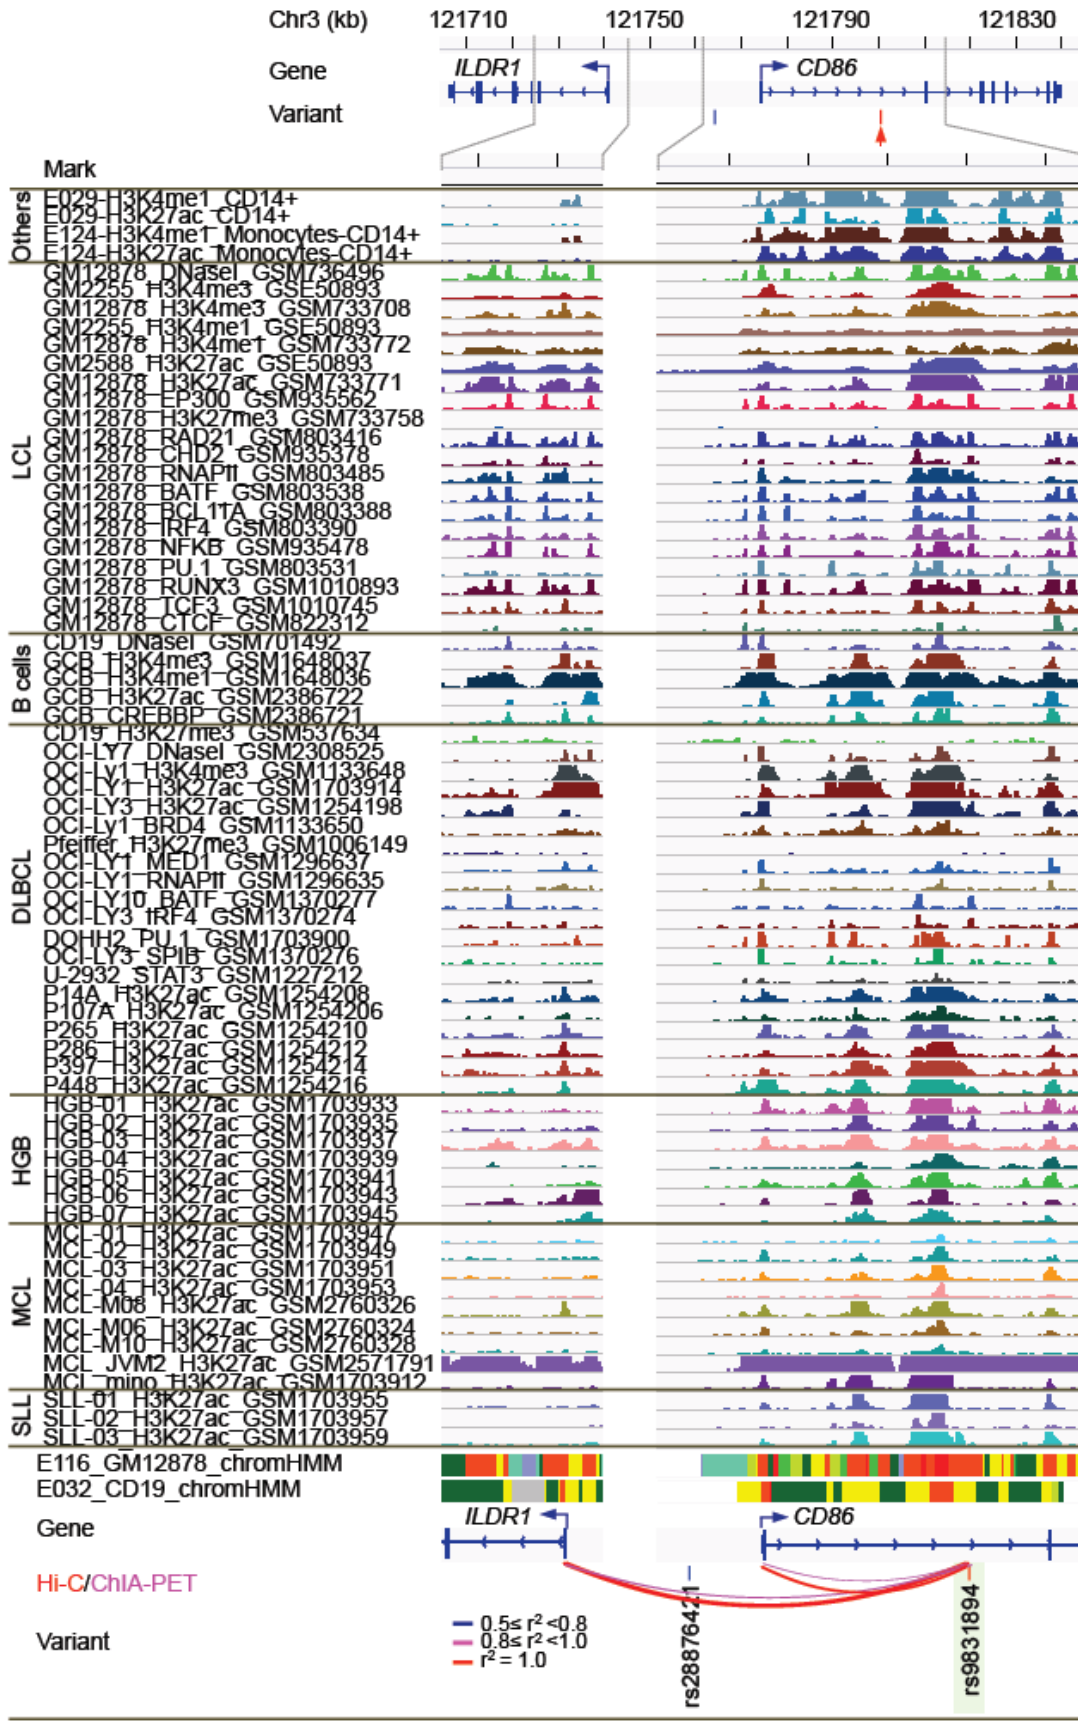

**Supplementary Figure 2. Regulatory variant at rs9831894-tagged DLBCL risk locus on 3q13.33.** The ATAC-seq data for the 14 blood cell types was downloaded from NCBI GEO under the accession GSE74912. The enhancer carrying tag SNP rs9831894 was found to be transcribed into eRNA in GM12878 (highlighted). In GM12878, this enhancer, like the *ILDR1* and *CD86* promoter it interacted with, showed the binding of RNAPII, P300, RAD21, MED1, and multiple TFs, as typically seen for transcribed enhancer. GMP, granulocyte macrophage progenitor; LMPP, lymphoid primed multipotent progenitor; MEP, megakaryocyte erythroid progenitor. See Supplementary Figure 1 legend for additional information.

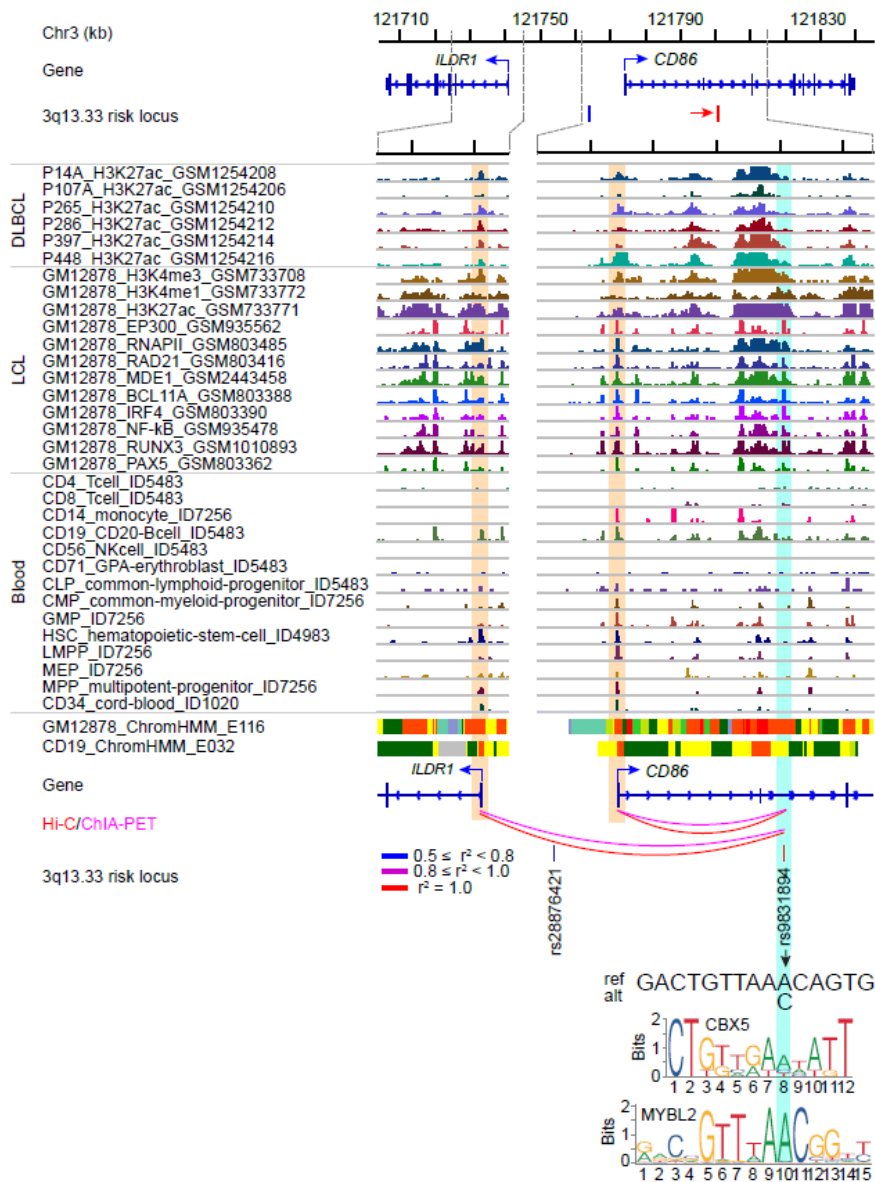

**Supplementary Figure 3. Epigenetic features of rs6773363 at independent loci associated with the risk of DLBCL.** Epigenetic features at the 3p24.1 risk locus. This 74,961-bp risk locus contains 51 variants ( $r^2 \geq 0.5$ ), with red arrow indicating the tag SNP rs6773363. For simplicity, only 11 of the variants were displayed (bottom panel) for the association with epigenetic profiles. Forty-three of the variants starting from rs34269949, including the tag SNP, did not overlap any of the active marks assayed in B-cells and DLBCL. Four variants between rs2371108 to rs9866625 ( $r^2 > 0.7$ ) overlapped an 11.6-kb super-enhancer. Based on the Hi-C data in GM12878 and capture Hi-C data from 17 blood cell types, this region showed strong long-range interactions with the promoters of *AZ12* and *ZCWPW2*. Rs3806624 (highlighted in light blue), located 417 bp upstream of the transcription start site of *EOMES*, is in the edge of the super-enhancer. E004, H1 BMP4 derived mesendoderm cultured cells; E046, primary natural killer cells from peripheral blood (CD56+); E124, monocytes-CD14+ RO01746 primary cells.

#### Chromatin state

|                                                                                   |                                   |                                                                                   |                              |
|-----------------------------------------------------------------------------------|-----------------------------------|-----------------------------------------------------------------------------------|------------------------------|
|  | 1 Active TSS                      |  | 9 Heterochromatin            |
|  | 2 Flanking active TSS             |  | 10 Bivalent/poised TSS       |
|  | 3 Transcription at gene 5' and 3' |  | 11 Flanking bivalent TSS/Enh |
|  | 4 Strong transcription            |  | 12 Bivalent enhancer         |
|  | 5 Weak transcription              |  | 13 Repressed Polycomb        |
|  | 6 Genic enhancers                 |  | 14 Weak repressed Polycomb   |
|  | 7 Enhancers                       |                                                                                   | 15 Quiescent/low             |
|  | 8 ZNF genes + repeats             |                                                                                   |                              |

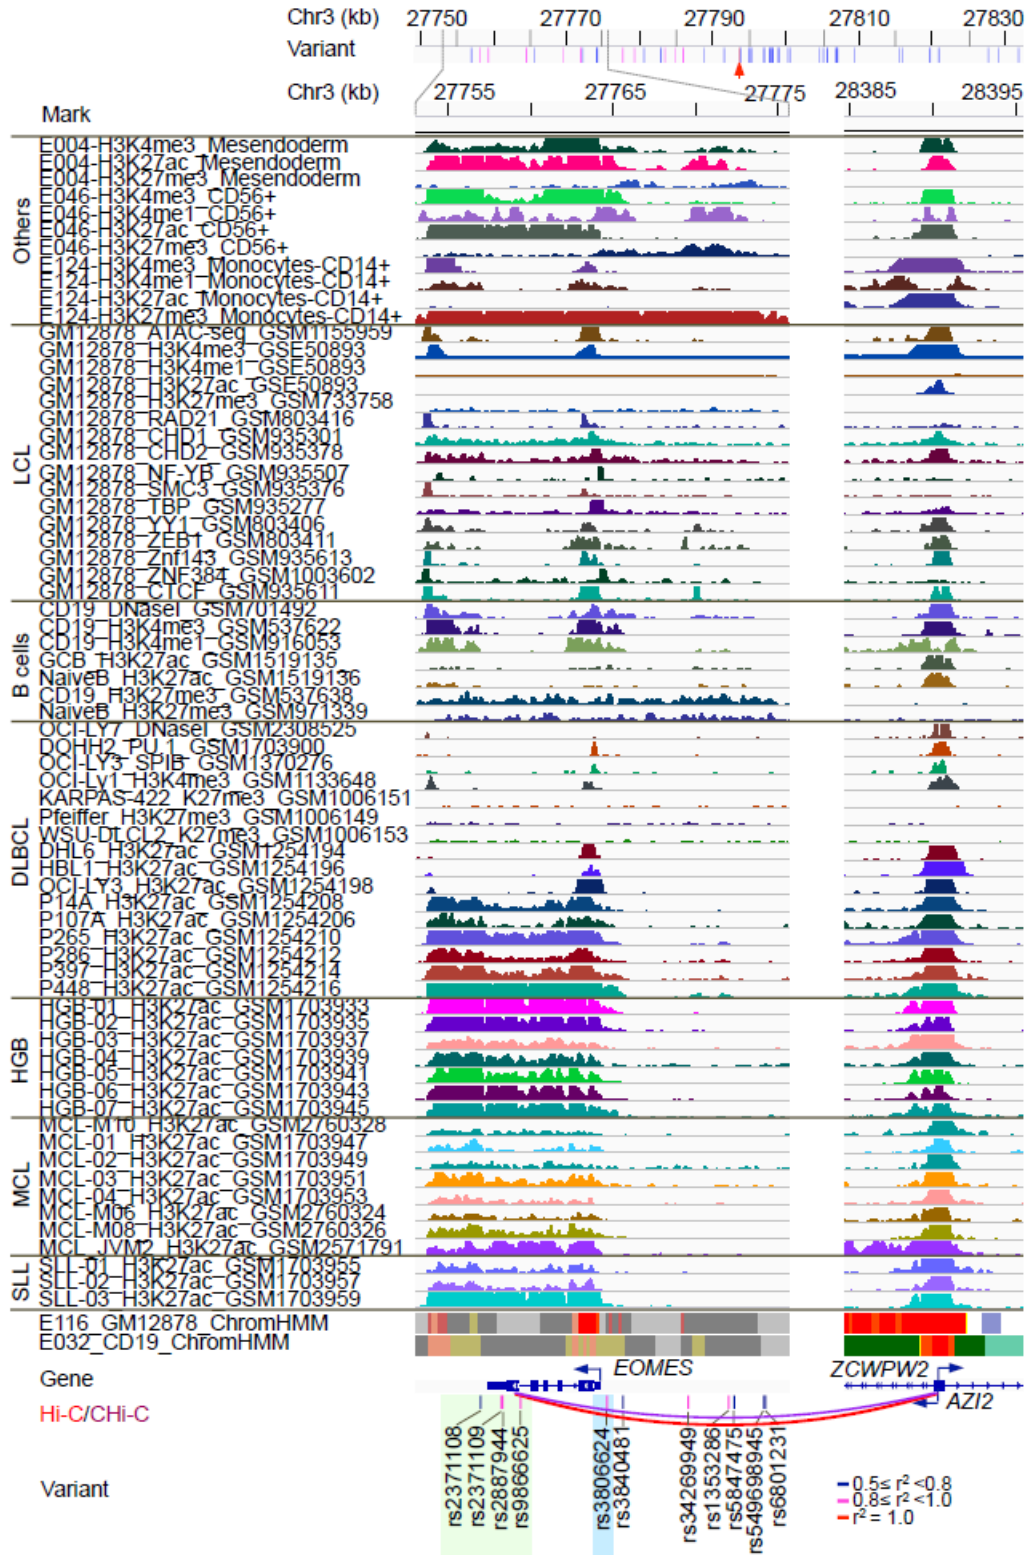

**Supplementary Figure 4. Regulatory variants at rs6773363-tagged DLBCL risk locus on 3p24.1.** The ATAC-seq data for the 14 blood cell types was downloaded from NCBI GEO under the accession GSE74912. SNP rs2371108 (highlighted), which overlapped a DLBCL super-enhancer, is located within an open chromatin region in nine blood cell types. The alternative T allele at this SNP was predicted to disrupt FOX3, GLI1, KLF3, and ZIC3 binding motif. In addition, SNP rs3806624 (highlighted) is located in an open chromatin region in hematopoietic stem cell. GMP, granulocyte macrophage progenitor; LMPP, lymphoid primed multipotent progenitor; MEP, megakaryocyte erythroid progenitor. See Supplementary Figure 3 legend for additional information.

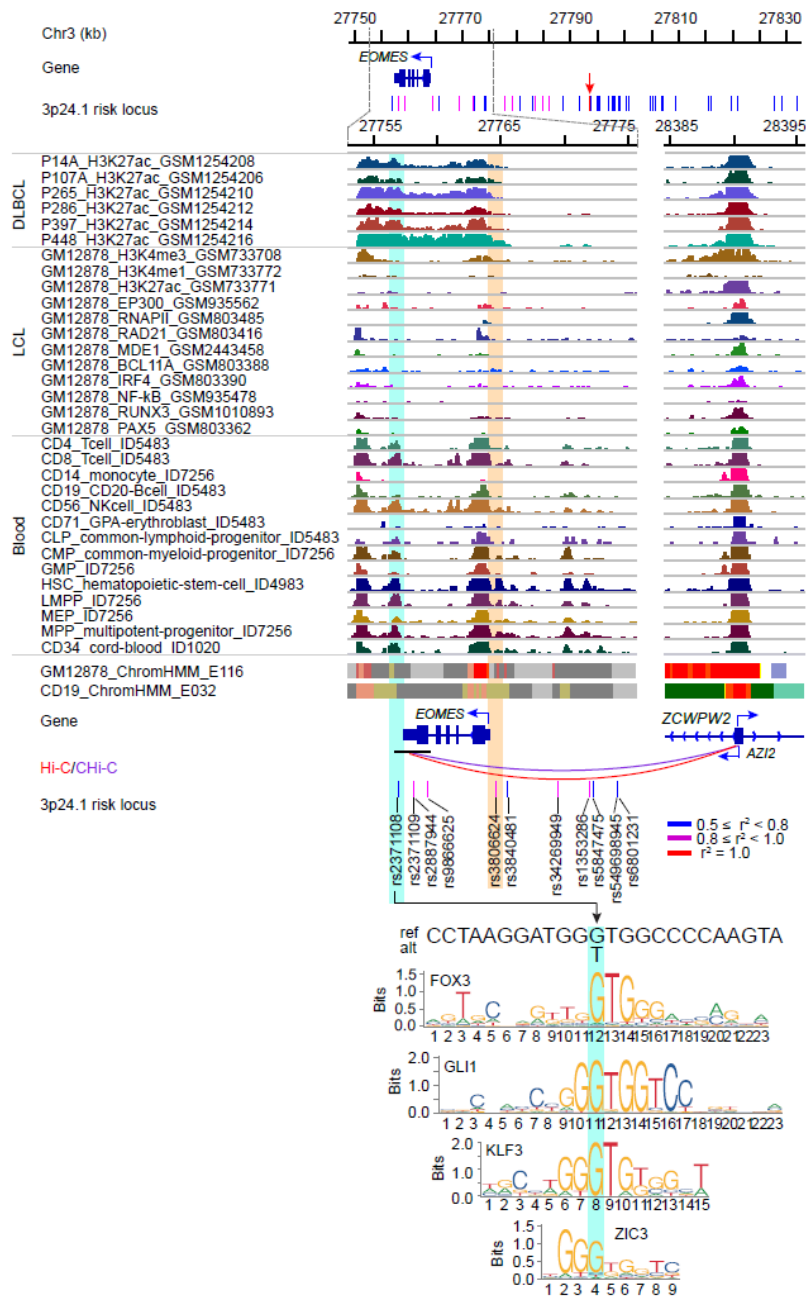



**Supplementary Figure 5. H3K27ac enrichment in DLBCL risk loci across 12 cell types.** Except DLBCL patient biopsy, the other 11 cell types are from the 127 reference epigenome, available at <https://egg2.wustl.edu/roadmap/data/byFileType/peaks/consolidated/narrowPeak/>. Only those whose H3K27ac peaks overlapped at least one of the risk loci were shown. The empirical  $p$  value was calculated by comparing to a null distribution of randomly sampling minor-allele-frequency-matched variants from the 1000 Genomes Project phase 3 release (Methods). DLBCL risk variants are enriched in DLBCL enhancer as expected, and in enhancers from three immune related cell types as well. E004-E116: reference epigenome identifier.

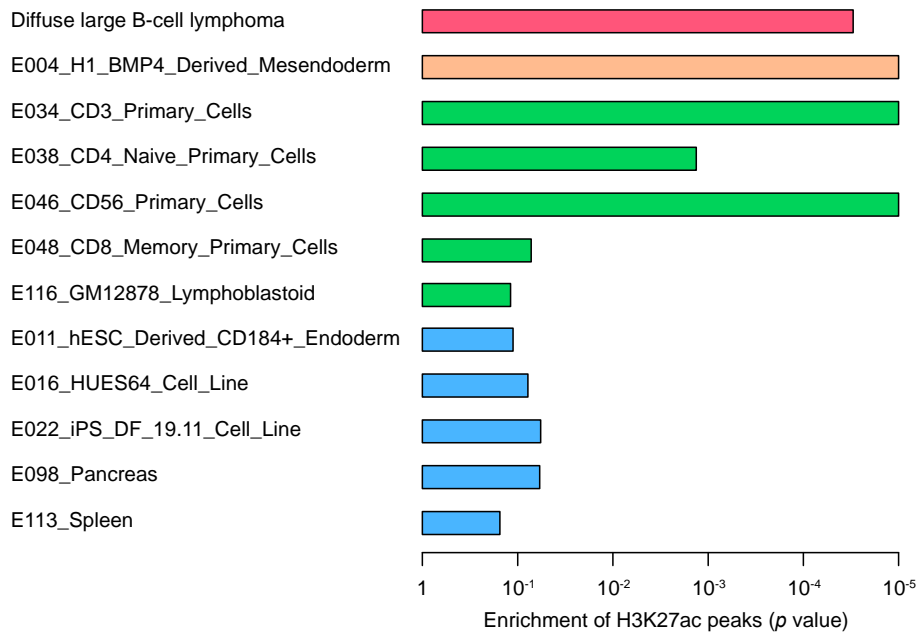

### Supplementary Figure 6. Schematic of the study design

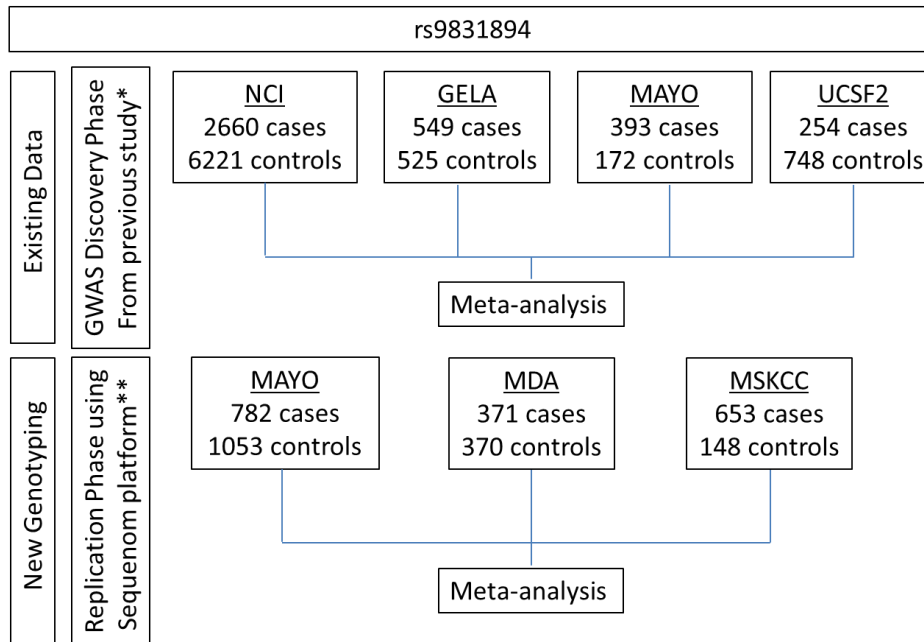

\*Cerhan, J.R. *et al.* (2014) Genome-wide association study identifies multiple susceptibility loci for diffuse large B cell lymphoma. *Nature genetics*, **46**, 1233–8.

\*\*SNP failed design with Taqman and was unable to be analyzed in the replication stage in our previous GWAS.

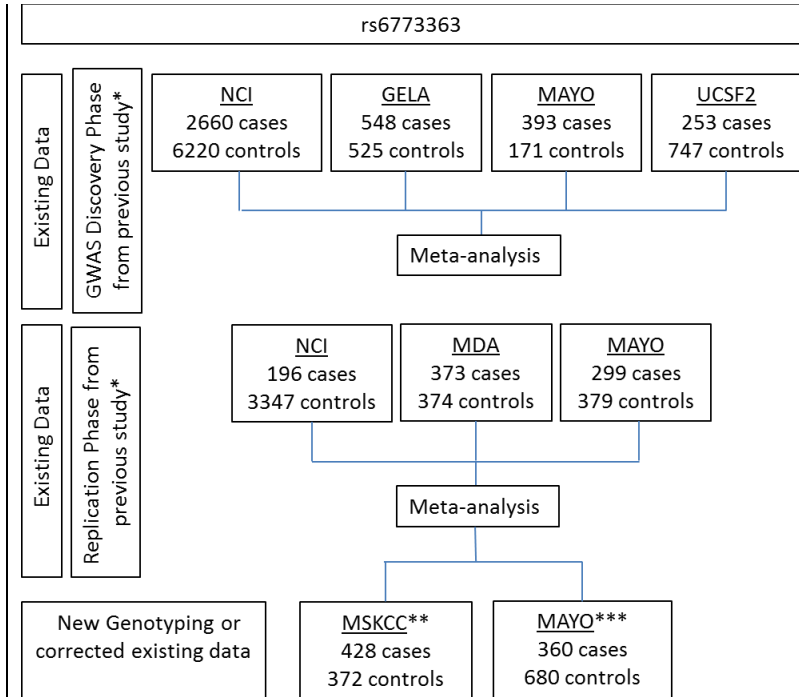

\*Cerhan, J.R. *et al.* (2014) Genome-wide association study identifies multiple susceptibility loci for diffuse large B cell lymphoma. *Nature genetics*, **46**, 1233–8.

\*\*SNP miscoded in the original replication stage in our previous GWAS and now corrected

\*\*\*Additional cases and controls genotyped from Mayo in addition to our previous replication phase



## Supplementary References

1. Zhang,J., Vlasevska,S., Wells,V.A., Nataraj,S., Holmes,A.B., Duval,R., Meyer,S.N., Mo,T., Basso,K., Brindle,P.K., *et al.* (2017) The CREBBP Acetyltransferase Is a Haploinsufficient Tumor Suppressor in B-cell Lymphoma. *Cancer discovery*, **7**, 322–337.
2. ENCODE Project Consortium (2012) An integrated encyclopedia of DNA elements in the human genome. *Nature*, **489**, 57–74.
3. Qian,J., Wang,Q., Dose,M., Pruett,N., Kieffer-Kwon,K.-R., Resch,W., Liang,G., Tang,Z., Mathé,E., Benner,C., *et al.* (2014) B cell super-enhancers and regulatory clusters recruit AID tumorigenic activity. *Cell*, **159**, 1524–37.
4. Abraham,B.J., Cui,K., Tang,Q. and Zhao,K. (2013) Dynamic regulation of epigenomic landscapes during hematopoiesis. *BMC genomics*, **14**, 193.
5. Zhang,J., Dominguez-Sola,D., Hussein,S., Lee,J.-E., Holmes,A.B., Bansal,M., Vlasevska,S., Mo,T., Tang,H., Basso,K., *et al.* (2015) Disruption of KMT2D perturbs germinal center B cell development and promotes lymphomagenesis. *Nature medicine*, **21**, 1190–8.
6. Chapuy,B., McKeown,M.R., Lin,C.Y., Monti,S., Roemer,M.G.M., Qi,J., Rahl,P.B., Sun,H.H., Yeda,K.T., Doench,J.G., *et al.* (2013) Discovery and characterization of super-enhancer-associated dependencies in diffuse large B cell lymphoma. *Cancer cell*, **24**, 777–90.
7. Ryan,R.J.H., Drier,Y., Whitton,H., Cotton,M.J., Kaur,J., Issner,R., Gillespie,S., Epstein,C.B., Nardi,V., Sohani,A.R., *et al.* (2015) Detection of Enhancer-Associated Rearrangements Reveals Mechanisms of Oncogene Dysregulation in B-cell Lymphoma. *Cancer discovery*, **5**, 1058–71.
8. Abraham,B.J., Hnisz,D., Weintraub,A.S., Kwiatkowski,N., Li,C.H., Li,Z., Weichert-Leahey,N., Rahman,S., Liu,Y., Etchin,J., *et al.* (2017) Small genomic insertions form enhancers that misregulate oncogenes. *Nature Communications*, **8**, 14385.
9. McCabe,M.T., Ott,H.M., Ganji,G., Korenchuk,S., Thompson,C., Van Aller,G.S., Liu,Y., Graves,A.P., Della Pietra,A., Diaz,E., *et al.* (2012) EZH2 inhibition as a therapeutic strategy for lymphoma with EZH2-activating mutations. *Nature*, **492**, 108–12.
10. Kacmarczyk,T.J., Bourque,C., Zhang,X., Jiang,Y., Houvras,Y., Alonso,A. and Betel,D. (2015) Multiplexing of ChIP-Seq Samples in an Optimized Experimental Condition Has Minimal Impact on Peak Detection. *PLoS one*, **10**, e0129350.
11. Care,M.A., Cocco,M., Laye,J.P., Barnes,N., Huang,Y., Wang,M., Barrans,S., Du,M., Jack,A., Westhead,D.R., *et al.* (2014) SPIB and BATF provide alternate determinants of IRF4 occupancy in diffuse large B-cell lymphoma linked to disease heterogeneity. *Nucleic acids research*, **42**, 7591–610.
12. Steube,A., Schenk,T., Tretyakov,A. and Saluz,H.P. (2017) High-intensity UV laser ChIP-seq for the study of protein-DNA interactions in living cells. *Nature communications*, **8**, 1303.
13. Hardee,J., Ouyang,Z., Zhang,Y., Kundaje,A., Lacroute,P. and Snyder,M. (2013) STAT3 targets suggest mechanisms of aggressive tumorigenesis in

- diffuse large B-cell lymphoma. *G3 (Bethesda, Md)*, **3**, 2173–85.
14. Ryan,R.J.H., Petrovic,J., Rausch,D.M., Zhou,Y., Lareau,C.A., Kluk,M.J., Christie,A.L., Lee,W.Y., Tarjan,D.R., Guo,B., *et al.* (2017) A B Cell Regulome Links Notch to Downstream Oncogenic Pathways in Small B Cell Lymphomas. *Cell reports*, **21**, 784–797.
  15. Koues,O.I., Kowalewski,R.A., Chang,L.-W., Pyfrom,S.C., Schmidt,J.A., Luo,H., Sandoval,L.E., Hughes,T.B., Bednarski,J.J., Cashen,A.F., *et al.* (2015) Enhancer sequence variants and transcription-factor deregulation synergize to construct pathogenic regulatory circuits in B-cell lymphoma. *Immunity*, **42**, 186–98.

**Support for individual studies:**

**ATBC** – Intramural Research Program of the National Institutes of Health, NCI, Division of Cancer Epidemiology and Genetics. U.S. Public Health Service contracts (N01-CN-45165, N01-RC-45035, N01-RC-37004, HHSN261201000006C).

**BC** – Canadian Institutes for Health Research (CIHR). Canadian Cancer Society. Michael Smith Foundation for Health Research.

**CPSII** – The American Cancer Society funds the creation, maintenance, and updating of the CPSII cohort. The authors thank the CPS-II participants and Study Management Group for their invaluable contributions to this research. The authors would also like to acknowledge the contribution to this study from central cancer registries supported through the Centers for Disease Control and Prevention National Program of Cancer Registries, and cancer registries supported by the National Cancer Institute Surveillance Epidemiology and End Results program.

**ELCCS** – Leukaemia & Lymphoma Research.

**ENGELA** – Fondation ARC pour la Recherche sur le Cancer. Fondation de France. French Agency for Food, Environmental and Occupational Health & Safety (ANSES), the French National Cancer Institute (INCa).

**EPIC** – Coordinated Action (Contract #006438, SP23-CT-2005-006438). HuGeF (Human Genetics Foundation), Torino, Italy.

**EPILYMPH** – European Commission (grant references QLK4-CT-2000-00422 and FOOD-CT-2006-023103); the Spanish Ministry of Health (grant references CIBERESP, PI11/01810, RCEP C03/09, RTICESP C03/10 and RTIC RD06/0020/0095), the Marató de TV3 Foundation (grant reference 051210), the Agència de Gestió d'Ajuts Universitaris de Recerca – Generalitat de Catalunya (grant reference 2009SGR1465) who had no role in the data collection, analysis or interpretation of the results; the NIH (contract NO1-CO-12400); the Compagnia di San Paolo—Programma Oncologia; the Federal Office for Radiation Protection grants StSch4261 and StSch4420, the José Carreras Leukemia Foundation grant DJCLS-R12/23, the German Federal Ministry for Education and Research (BMBF-01-EO-1303); the Health Research Board, Ireland and Cancer Research Ireland; Czech Republic supported by MH CZ – DRO (MMCI, 00209805) and RECAMO, CZ.1.05/2.1.00/03.0101; Fondation de France and Association de Recherche Contre le Cancer.

**GELA** – The French National Cancer Institute (INCa).

**HPFS** – The HPFS was supported in part by National Institutes of Health grants UM1 CA167552, R01 CA149445 and R01 CA098122. We would like to thank the

participants and staff of the Health Professionals Follow-up Study for their valuable contributions as well as the following state cancer registries for their help: AL, AZ, AR, CA, CO, CT, DE, FL, GA, ID, IL, IN, IA, KY, LA, ME, MD, MA, MI, NE, NH, NJ, NY, NC, ND, OH, OK, OR, PA, RI, SC, TN, TX, VA, WA, WY. The authors assume full responsibility for analyses and interpretation of these data. The study protocol was approved by the institutional review boards of the Brigham and Women's Hospital and Harvard T.H. Chan School of Public Health, and those of participating registries as required.

**Iowa-Mayo SPORE** – National Institutes of Health (CA97274). NCI Specialized Programs of Research Excellence (SPORE) in Human Cancer (P50 CA97274). Molecular Epidemiology of Non-Hodgkin Lymphoma Survival (R01 CA129539). Henry J. Predolin Foundation.

**Italian GxE** – Italian Ministry for Education, University and Research Research (PRIN 2007 prot. 2007WEJLZB, PRIN 2009 prot. 20092ZELR2); the Italian Association for Cancer Research (AIRC, Investigator Grant 11855). (M.G.E.) - Regional Law N. 7, 2007: “Basic research” (Progetti di ricerca fondamentale o di base) by the Regional Administration of Sardinia (CRP-59812/2012), Fondazione Banco di Sardegna 2010-2012.

**Mayo Clinic Case-Control** – National Institutes of Health (R01 CA92153). National Center for Advancing Translational Science (UL1 TR000135)

**MCCS** – The Melbourne Collaborative Cohort Study recruitment was funded by VicHealth and Cancer Council Victoria. The MCCS was further supported by Australian NHMRC grants 209057, 251553 and 504711 and by infrastructure provided by Cancer Council Victoria.

**MD Anderson** – Institutional support to the Center for Translational and Public Health Genomics.

**MSKCC** – Geoffrey Beene Cancer Research Grant, Lymphoma Foundation (LF5541). Barbara K. Lipman Lymphoma Research Fund (74419). Robert and Kate Niehaus Clinical Cancer Genetics Research Initiative (57470), U01 HG007033. ENCODE, U01 HG007033.

**NCI-SEER** – Intramural Research Program of the National Cancer Institute, National Institutes of Health, and Public Health Service (N01-PC-65064, N01-PC-67008, N01-PC-67009, N01-PC-67010, N02-PC-71105).

**NHS** – The NHS was supported in part by National Institutes of Health grants UM1 CA186107, PO1 CA87969, R01 CA49449, R01 CA149445 and R01 CA098122. We would like to thank the participants and staff of the Nurses' Health Study for their valuable contributions as well as the following state cancer registries for their help: AL, AZ, AR, CA, CO, CT, DE, FL, GA, ID, IL, IN, IA, KY, LA, ME, MD, MA, MI, NE, NH, NJ, NY, NC, ND, OH, OK, OR, PA, RI, SC, TN,

TX, VA, WA, WY. The authors assume full responsibility for analyses and interpretation of these data. The study protocol was approved by the institutional review boards of the Brigham and Women's Hospital and Harvard T.H. Chan School of Public Health, and those of participating registries as required.

**NSW** – was supported by grants from the Australian National Health and Medical Research Council (ID990920), the Cancer Council NSW, and the University of Sydney Faculty of Medicine.

**NYUWHS** - National Cancer Institute (R01 CA098661, P30 CA016087). National Institute of Environmental Health Sciences (ES000260).

**PLCO** - This research was supported by the Intramural Research Program of the National Cancer Institute and by contracts from the Division of Cancer Prevention, National Cancer Institute, NIH, DHHS.

**SCALE** – Swedish Cancer Society (2009/659). Stockholm County Council (20110209) and the Strategic Research Program in Epidemiology at Karolinska Institute. Swedish Cancer Society grant (02 6661). Danish Cancer Research Foundation Grant. Lundbeck Foundation Grant (R19-A2364). Danish Cancer Society Grant (DP 08-155). National Institutes of Health (5R01 CA69669-02). Plan Denmark.

**UCSF** – The UCSF studies were supported by the NCI, National Institutes of Health, CA1046282 and CA154643. The collection of cancer incidence data used in this study was supported by the California Department of Health Services as part of the statewide cancer reporting program mandated by California Health and Safety Code Section 103885; the National Cancer Institute's Surveillance, Epidemiology, and End Results Program under contract HHSN261201000140C awarded to the Cancer Prevention Institute of California, contract HHSN261201000035C awarded to the University of Southern California, and contract HHSN261201000034C awarded to the Public Health Institute; and the Centers for Disease Control and Prevention's National Program of Cancer Registries, under agreement #1U58 DP000807-01 awarded to the Public Health Institute. The ideas and opinions expressed herein are those of the authors, and endorsement by the State of California, the California Department of Health Services, the National Cancer Institute, or the Centers for Disease Control and Prevention or their contractors and subcontractors is not intended nor should be inferred.

**WHI** - The WHI program is funded by the National Heart, Lung, and Blood Institute, National Institutes of Health, U.S. Department of Health and Human Services through contracts HHSN268201600018C, HHSN268201600001C, HHSN268201600002C, HHSN268201600003C, and HHSN268201600004C. The authors thank the WHI investigators and staff for their dedication, and the study participants for making the program possible. A full listing of WHI

investigators can be found at:

<http://www.whi.org/researchers/Documents%20%20Write%20a%20Paper/WHI%20Investigator%20Long%20List.pdf>

**YALE** – National Cancer Institute (CA62006).
